# Supplementary material for: Effects of Bioinsecticidal Aegerolysin-Based Cytolytic Complexes on Non-Target Organisms
Source: MDPI journal article supplement (doi:10.3390/toxins13070457), 2021-06-30
Supplement: s1 [file s1]

# Supplementary Materials: Effects of Bioinsecticidal Aegerolysin-Based Cytolytic Complexes on Non-Target Organisms

Anastasija Panevska, Gordana Glavan, Anita Jemec Kokalj, Veronika Kukuljan, Tomaž Trobec, Monika Cecilija Žužek, Milka Vrecl, Damjana Drobne, Robert Frangež and Kristina Sepčič

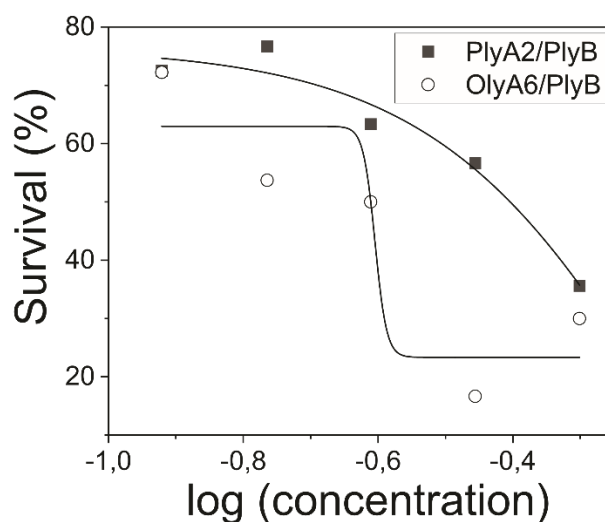

**Figure S1.** Data for survival rates of honeybees feeding on increasing concentrations of OlyA6/PlyB and PlyA2/PlyB for 48 h, and sigmoidal function fit curves used to derive LC<sub>50</sub> data.
